# Supplementary material
Source: publisher site journal article supplement (http://www.kjim.org/upload/media/kjim-2023-062-Supplementary-Fig-2.pdf)
Supplement: Supplementary file 1 [file kjim-2023-062-Supplementary-Fig-2.pdf]

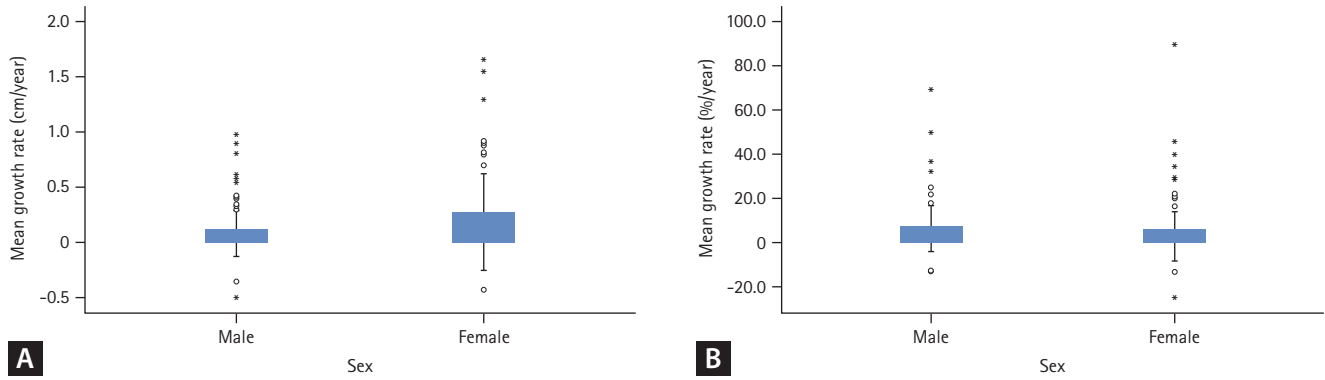

**Supplementary Figure 2.** Mean growth rate of hepatic hemangioma according to sex. (A) The mean annual growth rate of longest diameter (cm/year) was not different according to sex. (B) The mean annual percentage (%/year) was not different according to sex.
